# Supplementary material for: Defective migration and dysmorphology of neutrophil granulocytes in atypical chronic myeloid leukemia treated with ruxolitinib
Source: Springer Nature journal article supplement (doi:10.1186/s12885-020-07130-7), 2020-07-13

# Bornemann et al. Supplemental Figure 1

**A**

cell size distribution upon CXCL1 treatment  
before therapy

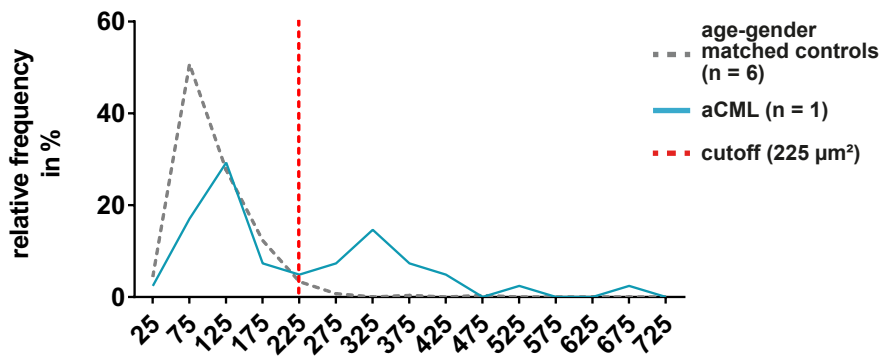

**B**

relative cell number of cells > 225  $\mu\text{m}^2$  in %

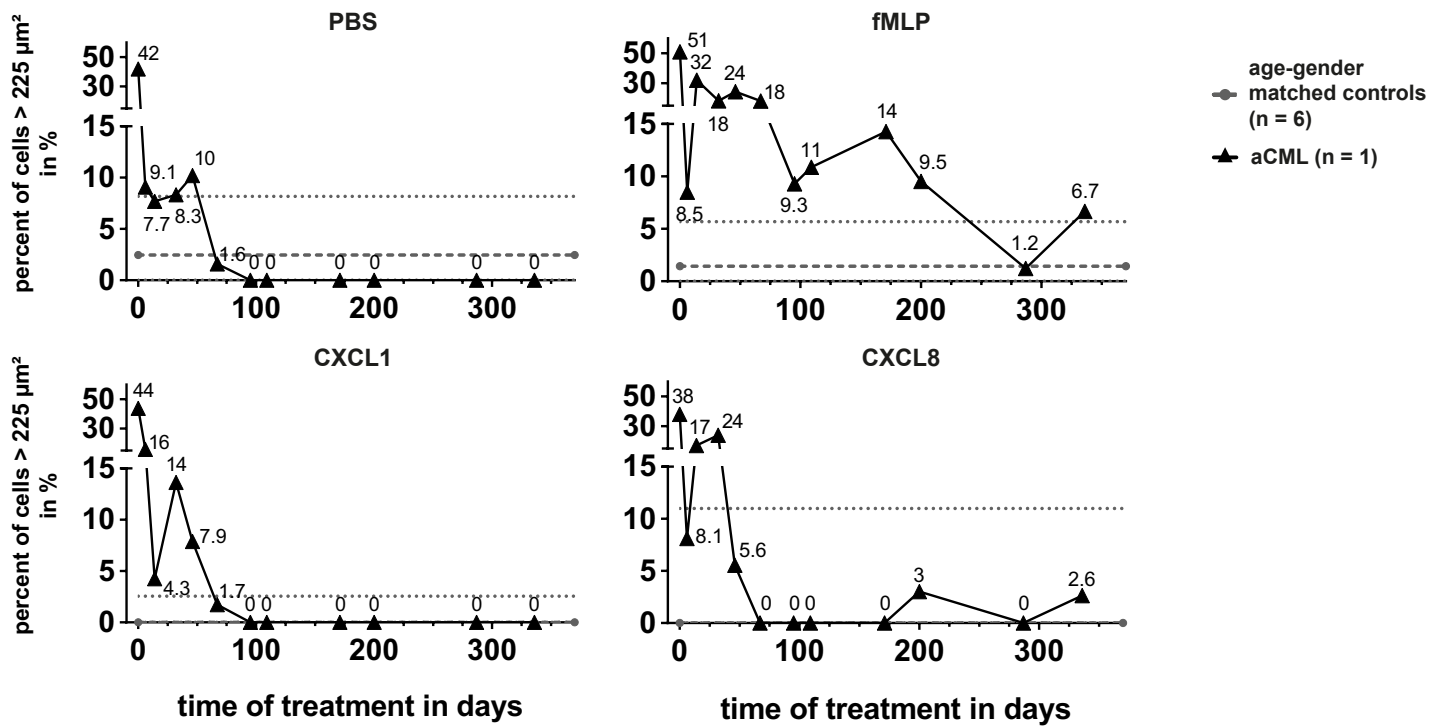

Supplement: MOESM1 [file 18177988]
