# Supplementary material for: Defective migration and dysmorphology of neutrophil granulocytes in atypical chronic myeloid leukemia treated with ruxolitinib
Source: Springer Nature journal article supplement (doi:10.1186/s12885-020-07130-7), 2020-07-13

**A**

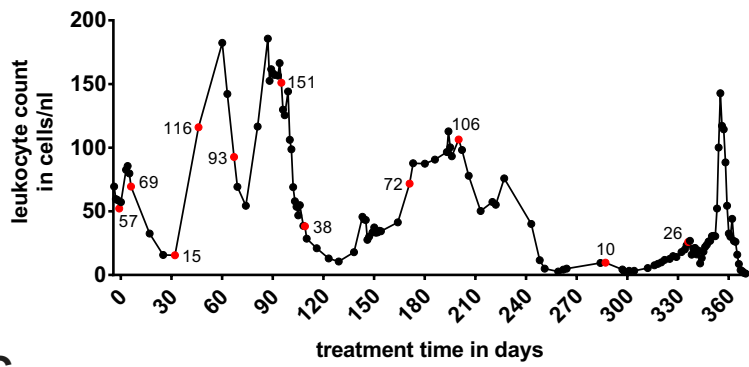

**B**

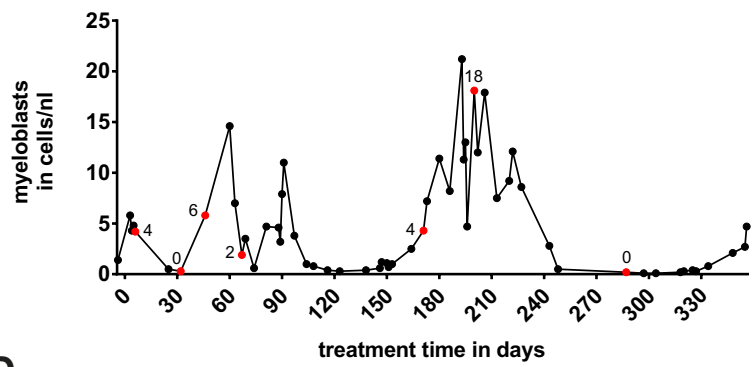

**C**

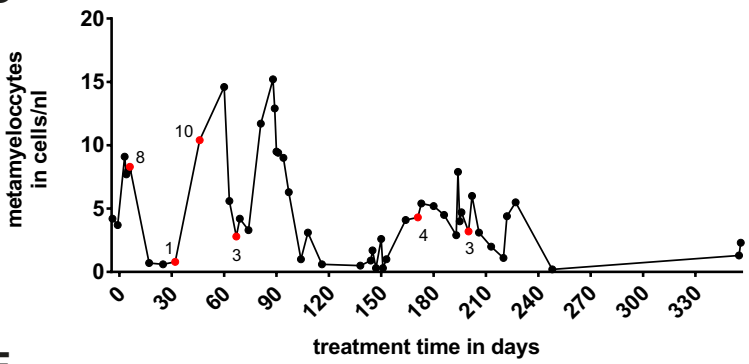

**D**

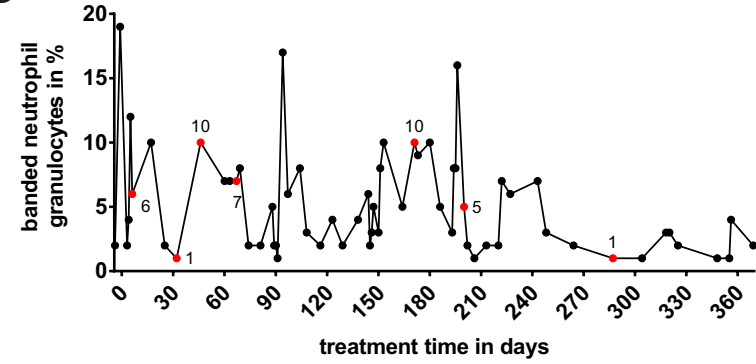

**E**

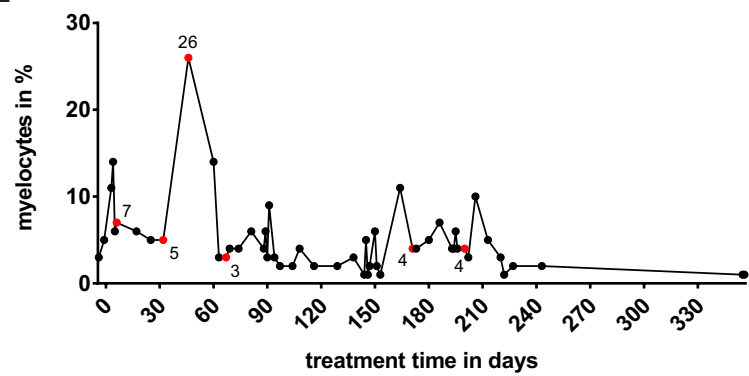

**F**

Correlation of peripheral cell counts and migration patterns for PBS stimulation

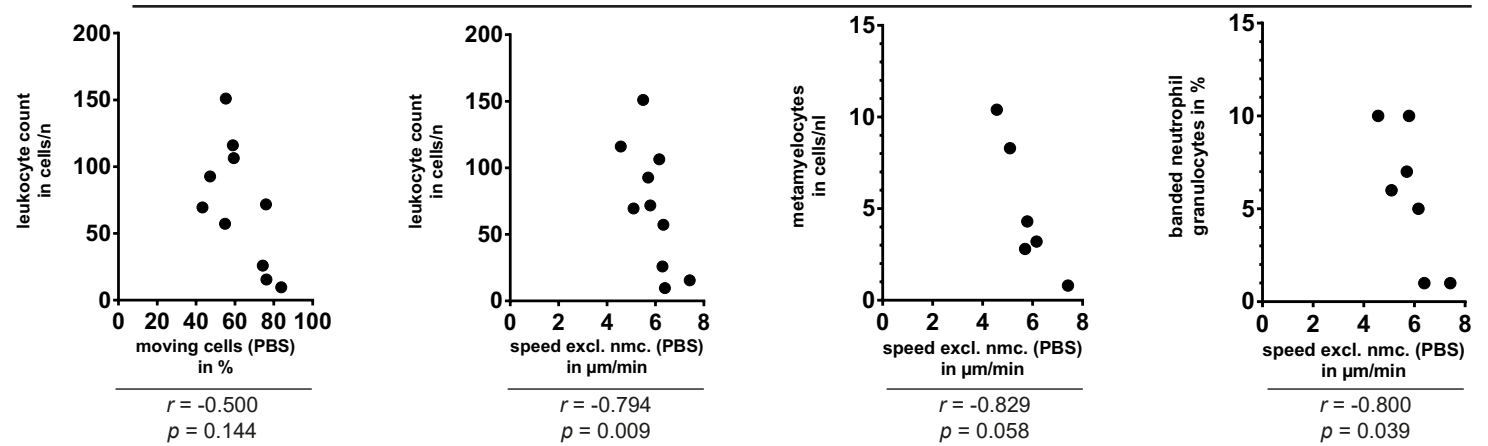

**G**

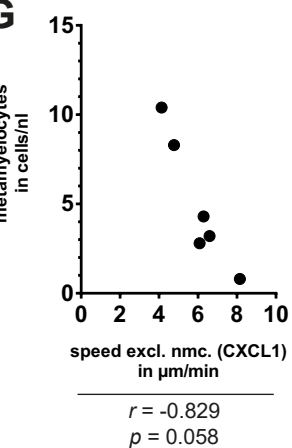

**H**

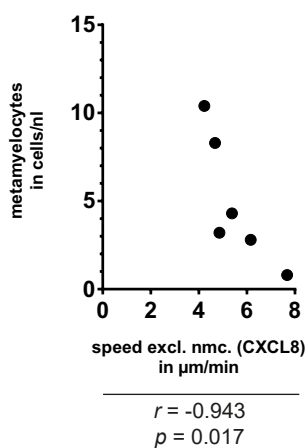

Supplement: MOESM3 [file 18177988]
